# Supplementary material for: Structural transition of VO2 (A) nanorods studied by vibrational spectroscopies
Source: Royal Society of Chemistry journal article supplement (doi:10.1039/c4ra00585f), 2014-01-01
Supplement: c4ra00585f1.pdf [file c4ra00585f1.pdf]

**Supporting Information:**

**Structural transition of VO<sub>2</sub> (A) nanorods studied by vibrational spectroscopies**

**Jiwei Hou,<sup>a</sup> Jianwu Zhang,<sup>\*a</sup> Zhongping Wang,<sup>b</sup> Zengming Zhang,<sup>b</sup> and Zejun Ding<sup>a</sup>**

<sup>a</sup>Department of Physics and Hefei National Laboratory for Physical Sciences at Microscale, University of Science and Technology of China, Hefei, Anhui 230026, China. Fax: +86-551-63600614; Tel: +86-551-63600614; E-mail: [zjw@ustc.edu.cn](mailto:zjw@ustc.edu.cn)

<sup>b</sup>The centre of Physical Experiments, University of Science and Technology of China, Hefei, Anhui 230026, China.

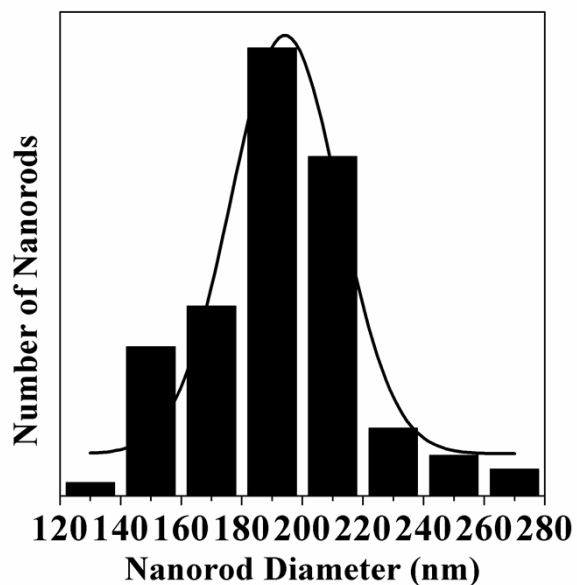

Figure S1. Histogram describes the diameter statistical distribution of the VO<sub>2</sub> (A) nanorods
